# Supplementary material for: Modulation of daily PM 2.5 concentrations over China in winter by large-scale circulation and climate change
Source: Copernicus journal article supplement (doi:10.5194/acp-23-2829-2023), 2023-03-02
Supplement: Supplementary file [file acp-23-2829-2023-supplement.pdf]

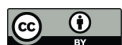

*Supplement of*

## **Modulation of daily PM<sub>2.5</sub> concentrations over China in winter by large-scale circulation and climate change**

**Zixuan Jia et al.**

*Correspondence to:* Zixuan Jia (z.jia-6@sms.ed.ac.uk)

The copyright of individual parts of the supplement might differ from the article licence.

## Supporting information

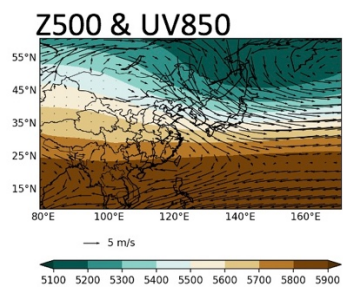

- 5 **Figure S1: UKESM1-simulated winter mean daily 500 hPa geopotential height (Z500; m, shading) and 850 hPa wind (arrows) during DJF 1999–2018.**

10

15

20

25

## Heavily polluted–winter mean

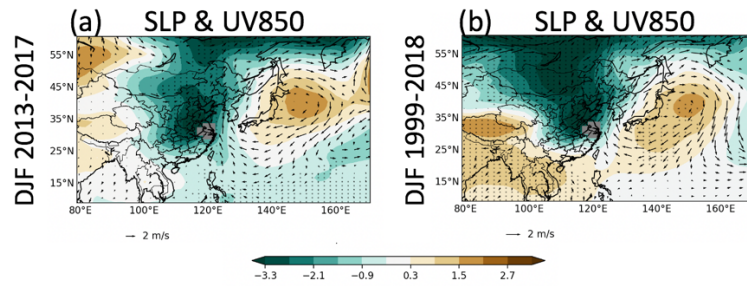

**Figure S2: Anomalies (heavily polluted days minus winter mean) of SLP (hPa, shading) and 850 hPa wind ( $\text{m s}^{-1}$ , vector) during (a) DJF 2013–2017 and (b) DJF 1999–2018 over YRD. Dotted regions mark statistically significant differences at the 95 % level. Grey shading represents the YRD region.**

5

10

15

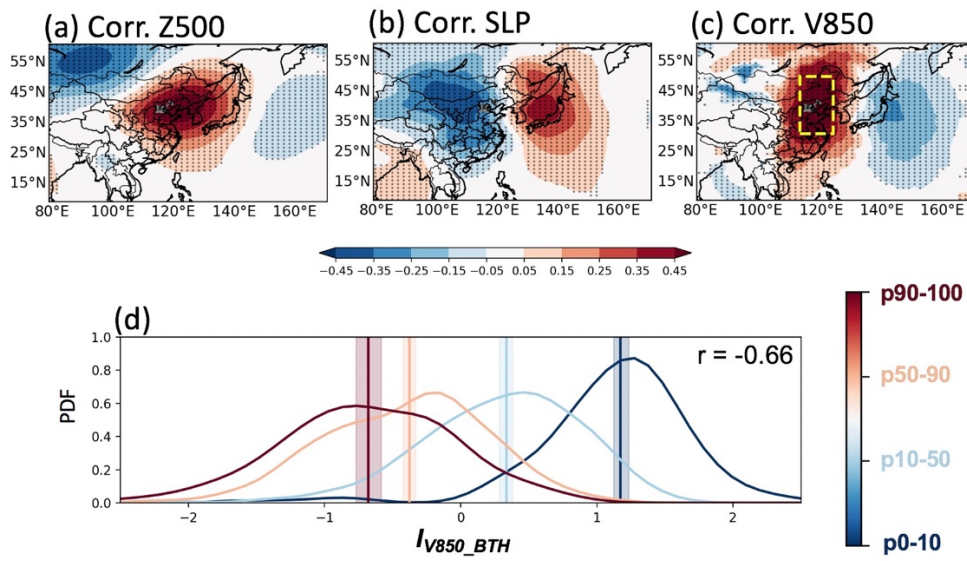

Figure S3: Correlation coefficients of UKESM1-simulated daily PM<sub>2.5</sub> concentrations in BTH with (a) Z500, (b) SLP and (c) V850 during DJF 1999–2018 (dotted regions indicate significant correlations at the 95% level from a two-tailed Student’s t-test). Grey shading represents the BTH region. The region used for the definition of a circulation-based index for BTH is marked by a yellow rectangle in panel c. (d) As in Figure 7 of the main text, but for the circulation-based index for BTH.

10

15

20

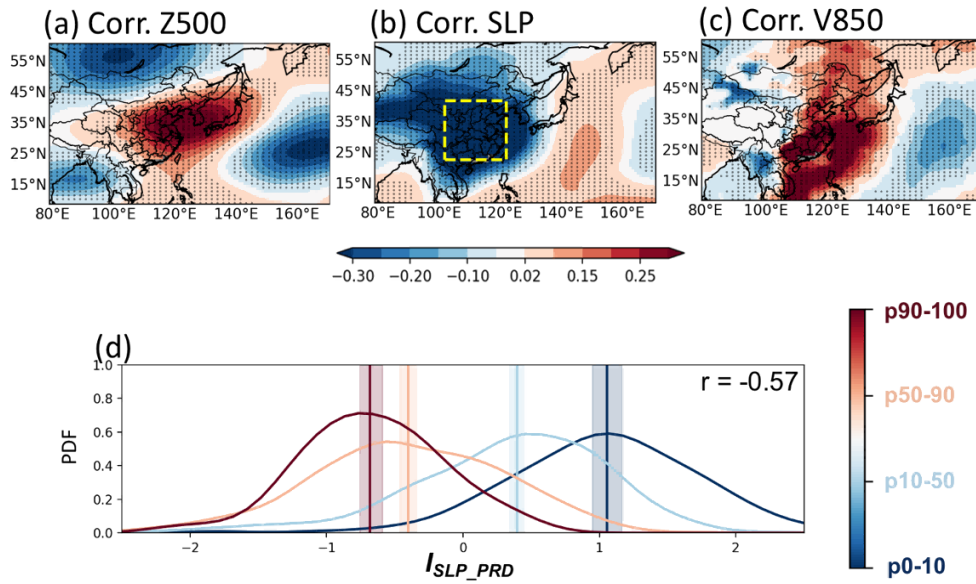

5 Figure S4: Correlation coefficients of UKESM1-simulated daily PM<sub>2.5</sub> concentrations in PRD with (a) Z500, (b) SLP and (c) V850 during DJF 1999–2018 (dotted regions indicate significant correlations at the 95% level from a two-tailed Student's *t*-test). Grey shading represents the PRD region. The region used for the definition of a circulation-based index for PRD is marked by a yellow rectangle in panel b. (d) As in Figure 7 of the main text, but for the circulation-based index for PRD.

10

15

20

Winter mean emission changes of fossil fuel OC from 2014 to SSP3-7.0 2058

Winter mean OM and PM<sub>2.5</sub> changes due to emission reduction over YRD for DJF 2014-18

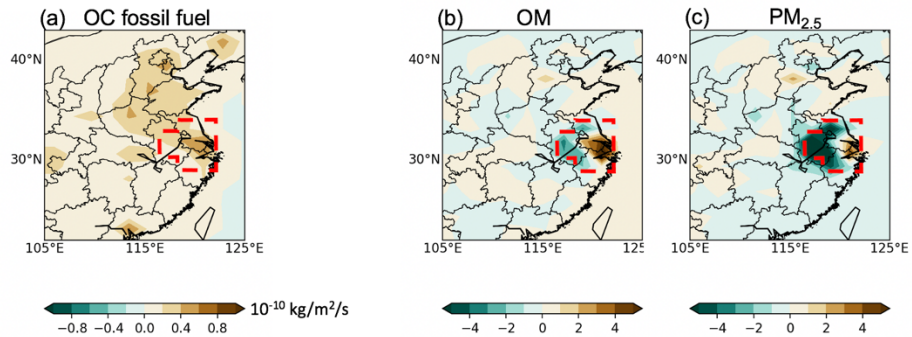

Figure S5: (a) CMIP6 emission changes of organic carbon (OC) from fossil fuel combustion from historical 2014 to SSP3-7.0 2058. Winter mean (b) organic matter (OM) changes ( $\mu\text{g}/\text{m}^3$ ) and (c) PM<sub>2.5</sub> changes ( $\mu\text{g}/\text{m}^3$ ) during DJF 2014-2018 due to emission reductions over YRD. The red box represents the YRD region.

5

10

15

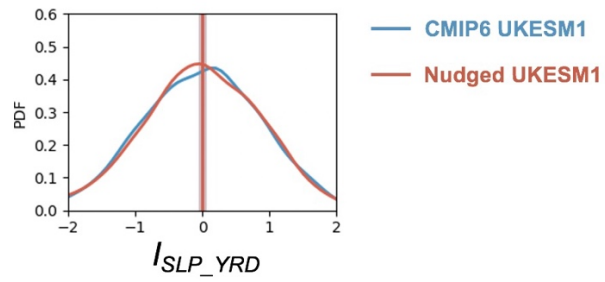

**Figure S6: Frequency distributions of daily mean  $I_{SLP\_YRD}$  during DJF 1999-2014 from nudged UKESM1 and from the UKESM1 historical run in the CMIP6 archive. The vertical lines and shading represent the mean values and the associated 95% confidence intervals, respectively.**

5

10

15

20

25

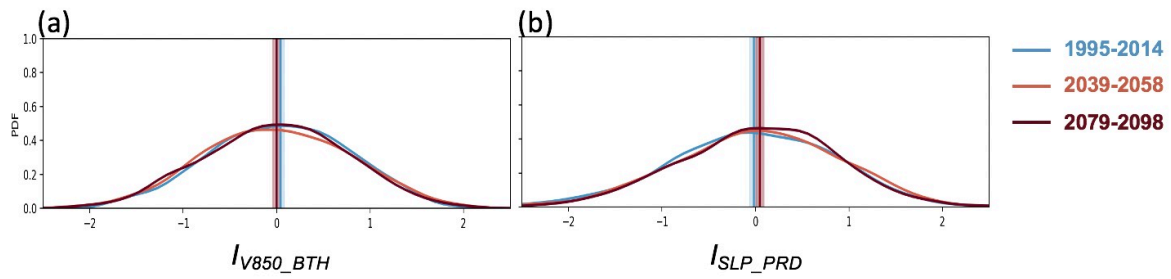

**Figure S7: Frequency distributions of daily mean circulation-based indices for (a) BTH and (b) PRD during winter for present day (1995-2014), mid-century (2039-2058) and the end of century (2079-2098).**

5

10

15

20

25

30



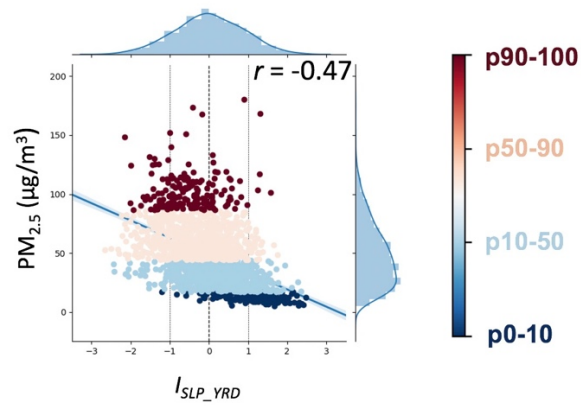

**Figure S8: Joint distributions of daily  $I_{SLP\_YRD}$  against  $PM_{2.5}$  concentrations over YRD for different percentile thresholds (colour coded), including the corresponding linear fits with 95 % prediction intervals, during DJF 1999–2018.**

5

10

15

20

25

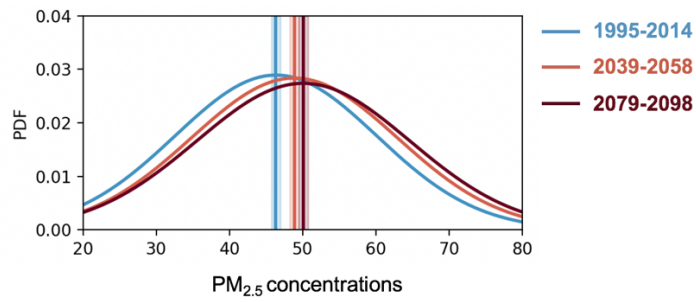

**Figure S9: Normal frequency distributions of daily mean climate-driven PM<sub>2.5</sub> concentrations (µg/m<sup>3</sup>) over YRD during winter over present day (1995-2014), mid-century (2039-2058) and the end of century (2079-2098). The vertical lines and shading represent the mean values and the associated 95% confidence intervals, respectively.**

5

10

15

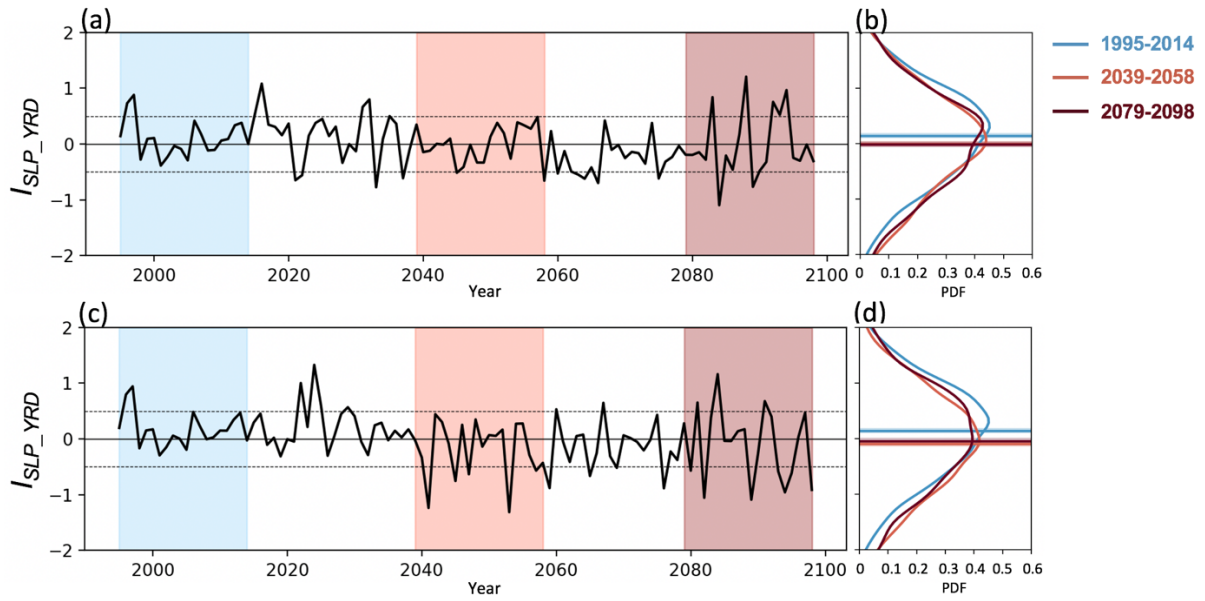

Figure S10: Time series of winter mean  $I_{SLP\_YRD}$  from historical (1995–2014) and (a) future (2015–2098, SSP1-2.6) simulations, (c) future (2015–2098, SSP2-4.5) simulations of UKESM1 in the CMIP6 archive. Blue, orange and red areas represent present day (1995-2014), mid-century (2039-2058) and the end of century (2079-2098), respectively. (b) (d) Frequency distributions of daily mean  $I_{SLP\_YRD}$  during winter over each period. The horizontal lines and shading represent the mean values and the associated 95% confidence intervals, respectively.

10

15

20

**Table S1: Winter mean anthropogenic emissions of sulphur dioxide (SO<sub>2</sub>), organic carbon (OC) and black carbon (BC) in 2014 (CMIP6 historical) and 2058 (CMIP6, scenario SSP3-7.0) over YRD, north China and south China. The three regions are displayed on Figure 8.**

| Emissions<br>(Unit: 10 <sup>-10</sup><br>kg/m <sup>2</sup> /s) | YRD  |      | north China |      | south China |      |
|----------------------------------------------------------------|------|------|-------------|------|-------------|------|
|                                                                | 2014 | 2058 | 2014        | 2058 | 2014        | 2058 |
| SO <sub>2</sub>                                                | 6.17 | 3.18 | 5.74        | 2.98 | 3.13        | 1.60 |
| OC                                                             | 0.73 | 0.77 | 0.86        | 0.83 | 0.37        | 0.40 |
| BC                                                             | 0.39 | 0.35 | 0.44        | 0.37 | 0.18        | 0.17 |
| Total                                                          | 7.29 | 4.30 | 7.04        | 4.18 | 3.68        | 2.17 |
